# Supplementary material
Source: publisher figshare collection journal article supplement (https://gsapubs.figshare.com/articles/dataset/_/12348614)
Supplement: Supplementary file 1 [file 1]

**Supplementary information**

Basins were identified by systematically scanning the continents using Google Earth<sup>®</sup> looking for relatively flat, low relief areas that contrast with surrounding regions of higher relief. This ‘low relief’ criterion was selected because we envision that aggrading sedimentary basins would be shown as relatively flat regions, where rivers filling the basins would result in smoothed topography. We also looked for evidence of lineaments and other structures that are consistent with fault-bounded sedimentary basins. Once we completed this cursory identification of the basins, we compiled and reviewed LANDSAT imagery (<http://glcfapp.umiacs.umd.edu:8080/esdi/index.jsp>) and SRTM data (<http://seamless.usgs.gov/>) to verify that low relief regions were properly identified. A literature search for modern continental sedimentary basins was also conducted in order to create as comprehensive a database as possible. Some of the included sedimentary basins appear to be incised at present and may be inactive.

We include locations of the basins in the database with basin names corresponding to their latitude and longitude location. Additionally, we provide a .kmz file for download to Google Earth<sup>®</sup>. We note that this is a work in progress and that we expect changes to this database as additional basins are identified and some possibly removed. Therefore, we call this database version 1.0 and look forward to collaborating with others to update and improve this database.

**Continental Sedimentary Basin Locations**  
**Basins Database, ver. 1.0**

*Weissmann et al., Fluvial form in modern continental sedimentary basins: The  
Distributive Fluvial System (DFS) Paradigm*

| <b>Basin Code</b> | <b>Latitude</b> | <b>Longitude</b> |             |       |         |
|-------------------|-----------------|------------------|-------------|-------|---------|
| N2580W10230       | 25.80           | -102.30          | N2630W10340 | 26.30 | -103.40 |
| N3025W10560       | 30.25           | -105.60          | N2640W10365 | 26.40 | -103.65 |
| N3085W11260       | 30.85           | -112.60          | N2760W10400 | 27.60 | -104.00 |
| N3230W11565       | 32.30           | -115.65          | N2765W10380 | 27.65 | -103.80 |
| N2240W09980       | 22.40           | -99.80           | N2790W10321 | 27.90 | -103.21 |
| N2225W09970       | 22.25           | -99.70           | N2765W10295 | 27.65 | -102.95 |
| N2247W10059       | 22.47           | -100.59          | N2715W10220 | 27.15 | -102.20 |
| N2270W10090       | 22.70           | -100.90          | N2850W10305 | 28.50 | -103.05 |
| N2490W10500       | 24.90           | -105.00          | N2929W10580 | 29.29 | -105.80 |
| N2390W10410       | 23.90           | -104.10          | N2930W10632 | 29.30 | -106.32 |
| N2497W10386       | 24.97           | -103.86          | N2915W10740 | 29.15 | -107.40 |
| N2490W10330       | 24.90           | -103.30          | N3075W10695 | 30.75 | -106.95 |
| N2507W12095       | 25.07           | -102.95          | N3080W10665 | 30.80 | -106.65 |
| N2520W10355       | 25.20           | -103.55          | N3280W10730 | 32.80 | -107.30 |
| N2530W10400       | 25.30           | -104.00          | N3200W10740 | 32.00 | -107.40 |
| N2550W10370       | 25.50           | -103.70          | N3155W10810 | 31.55 | -108.10 |
| N2532W10325       | 25.32           | -103.25          | N3170W10850 | 31.70 | -108.50 |
| N2535W10270       | 25.35           | -102.70          | N3235W10895 | 32.35 | -108.95 |
| N2498W10264       | 24.98           | -102.64          | N3230W10930 | 32.30 | -109.30 |
| N2465W10240       | 24.65           | -102.40          | N3215W10990 | 32.15 | -109.90 |
| N2510W10230       | 25.10           | -102.30          | N3165W11018 | 31.65 | -110.18 |
| N2490W10200       | 24.90           | -102.00          | N3240W11130 | 32.40 | -111.30 |
| N2525W10225       | 25.25           | -102.25          | N3165W11105 | 31.65 | -111.05 |
| N2470W10127       | 24.70           | -101.27          | N3190W11140 | 31.90 | -111.40 |
| N2480W10098       | 24.80           | -100.98          | N3240W11175 | 32.40 | -111.75 |
| N2508W10116       | 25.08           | -101.16          | N3205W11240 | 32.05 | -112.40 |
| N2503W10117       | 25.03           | -101.17          | N3225W11320 | 32.25 | -113.20 |
| N2485W10070       | 24.85           | -100.70          | N3265W11355 | 32.65 | -113.55 |
| N2450W10040       | 24.50           | -100.40          | N3260W11380 | 32.60 | -113.80 |
| N2490W10040       | 24.90           | -100.40          | N3315W11565 | 33.15 | -115.65 |
| N2400W10092       | 24.00           | -100.92          | N3310W11390 | 33.10 | -113.90 |
| N2615W10045       | 26.15           | -100.45          | N3340W11425 | 33.40 | -114.25 |
| N2612W10012       | 26.12           | -100.12          | N3350W11465 | 33.50 | -114.65 |
| N2665W10050       | 26.65           | -100.50          | N3365W11500 | 33.65 | -115.00 |
| N2650W10165       | 26.50           | -101.65          | N3365W11375 | 33.65 | -113.75 |
| N2650W10110       | 26.50           | -101.10          | N3390W11345 | 33.90 | -113.45 |
| N2615W10130       | 26.15           | -101.30          | N3400W11370 | 34.00 | -113.70 |
| N2620W10177       | 26.20           | -101.77          | N3280W10690 | 32.80 | -106.90 |
| N2672W10145       | 26.72           | -101.45          | N3280W10630 | 32.80 | -106.30 |
| N2690W10200       | 26.90           | -102.00          | N3500W10665 | 35.00 | -106.65 |
| N2665W10250       | 26.65           | -102.50          | N3475W11413 | 34.75 | -114.13 |
| N2630W10270       | 26.30           | -102.70          | N3490W11455 | 34.90 | -114.55 |
| N2650W10310       | 26.50           | -103.10          | N3560W11400 | 35.60 | -114.00 |
|                   |                 |                  | N3530W11490 | 35.30 | -114.90 |

|             |       |         |             |       |         |
|-------------|-------|---------|-------------|-------|---------|
| N3480W11520 | 34.80 | -115.20 | N3790W11530 | 37.90 | -115.30 |
| N3420W11510 | 34.20 | -115.10 | N3800W11550 | 38.00 | -115.50 |
| N3430W11540 | 34.30 | -115.40 | N3845W11570 | 38.45 | -115.70 |
| N3450W11580 | 34.50 | -115.80 | N3770W11575 | 37.70 | -115.75 |
| N3415W11570 | 34.15 | -115.70 | N3729W11580 | 37.29 | -115.80 |
| N3480W11645 | 34.80 | -116.45 | N3750W11622 | 37.50 | -116.22 |
| N3483W11618 | 34.83 | -116.18 | N3800W11600 | 38.00 | -116.00 |
| N3492W11572 | 34.92 | -115.72 | N3825W11620 | 38.25 | -116.20 |
| N3550W11540 | 35.50 | -115.40 | N3810W11660 | 38.10 | -116.60 |
| N3580W11565 | 35.80 | -115.65 | N3750W11645 | 37.50 | -116.45 |
| N3550W11570 | 35.50 | -115.70 | N3770W11670 | 37.70 | -116.70 |
| N3550W11620 | 35.50 | -116.20 | N3785W11705 | 37.85 | -117.05 |
| N3520W11610 | 35.20 | -116.10 | N3785W11740 | 37.85 | -117.40 |
| N3527W11635 | 35.27 | -116.35 | N3775W11757 | 37.75 | -117.57 |
| N3528W11663 | 35.28 | -116.63 | N3800W11765 | 38.00 | -117.65 |
| N3505W11675 | 35.05 | -116.75 | N3803W11800 | 38.03 | -118.00 |
| N3503W11727 | 35.03 | -117.27 | N3785W11795 | 37.85 | -117.95 |
| N3490W11783 | 34.90 | -117.83 | N3770W11807 | 37.70 | -118.07 |
| N3456W11738 | 34.56 | -117.38 | N3760W11700 | 37.60 | -117.00 |
| N3398W11745 | 33.98 | -117.45 | N3750W11715 | 37.50 | -117.15 |
| N3400W11822 | 34.00 | -118.22 | N3720W11705 | 37.20 | -117.05 |
| N3420W11850 | 34.20 | -118.50 | N3720W11755 | 37.20 | -117.55 |
| N3417W11907 | 34.17 | -119.07 | N3710W11770 | 37.10 | -117.70 |
| N3493W11960 | 34.93 | -119.60 | N3765W11840 | 37.65 | -118.40 |
| N3520W11985 | 35.20 | -119.85 | N3710W12160 | 37.10 | -121.60 |
| N3520W11910 | 35.20 | -119.10 | N3660W12155 | 36.60 | -121.55 |
| N3535W11784 | 35.35 | -117.84 | N3735W12190 | 37.35 | -121.90 |
| N3645W11800 | 36.45 | -118.00 | N3915W12190 | 39.15 | -121.90 |
| N3600W11725 | 36.00 | -117.25 | N3896W11977 | 38.96 | -119.77 |
| N3620W11680 | 36.20 | -116.80 | N3895W11935 | 38.95 | -119.35 |
| N3670W11775 | 36.70 | -117.75 | N3890W11915 | 38.90 | -119.15 |
| N3667W11756 | 36.67 | -117.56 | N3875W11898 | 38.75 | -118.98 |
| N3645W11645 | 36.45 | -116.45 | N3865W11870 | 38.65 | -118.70 |
| N3680W11595 | 36.80 | -115.95 | N3855W11833 | 38.55 | -118.33 |
| N3695W11602 | 36.95 | -116.02 | N3888W11827 | 38.88 | -118.27 |
| N3670W11562 | 36.70 | -115.62 | N3896W11855 | 38.96 | -118.55 |
| N3665W11550 | 36.65 | -115.50 | N3925W11825 | 39.25 | -118.25 |
| N3670W11532 | 36.70 | -115.32 | N3930W11853 | 39.30 | -118.53 |
| N3700W11525 | 37.00 | -115.25 | N3930W11871 | 39.30 | -118.71 |
| N3715W11541 | 37.15 | -115.41 | N3965W11810 | 39.65 | -118.10 |
| N3735W11490 | 37.35 | -114.90 | N3955W11770 | 39.55 | -117.70 |
| N3740W10590 | 37.40 | -105.90 | N3930W11750 | 39.30 | -117.50 |
| N3870W10609 | 38.70 | -106.09 | N3880W11768 | 38.80 | -117.68 |
| N3785W11290 | 37.85 | -112.90 | N3925W11730 | 39.25 | -117.30 |
| N3800W11342 | 38.00 | -113.42 | N3900W11710 | 39.00 | -117.10 |
| N3825W11270 | 38.25 | -112.70 | N3900W11670 | 39.00 | -116.70 |
| N3830W11300 | 38.30 | -113.00 | N3880W11640 | 38.80 | -116.40 |
| N3820W11400 | 38.20 | -114.00 | N3940W11630 | 39.40 | -116.30 |
| N3785W11475 | 37.85 | -114.75 | N3870W11600 | 38.70 | -116.00 |
| N3800W11497 | 38.00 | -114.97 | N3890W11500 | 38.90 | -115.00 |

|             |       |         |             |        |           |
|-------------|-------|---------|-------------|--------|-----------|
| N3930W11520 | 39.30 | -115.20 | N4255W11820 | 42.55  | -118.20   |
| N3965W11570 | 39.65 | -115.70 | N4400W11380 | 44.00  | -113.80   |
| N3970W11540 | 39.70 | -115.40 | N4420W11330 | 44.20  | -113.30   |
| N3980W11515 | 39.80 | -115.15 | N4425W11300 | 44.25  | -113.00   |
| N3980W11480 | 39.80 | -114.80 | N4500W11230 | 45.00  | -112.45   |
| N3840W11490 | 38.40 | -114.90 | N3690W11545 | 36.90  | -115.45   |
| N3850W11460 | 38.50 | -114.60 | N3740W11740 | 37.40  | -117.40   |
| N3900W11450 | 39.00 | -114.50 | N3830W11810 | 38.30  | -118.10   |
| N3905W11400 | 39.05 | -114.00 | N3833W11780 | 38.33  | -117.80   |
| N3930W11350 | 39.30 | -113.50 | N3840W11760 | 38.40  | -117.60   |
| N3950W11280 | 39.50 | -112.80 | N3850W11695 | 38.50  | -116.95   |
| N4100W11250 | 41.00 | -112.50 | N4085W11485 | 40.85  | -114.85   |
| N4065W11445 | 40.65 | -114.45 | N4090W11900 | 40.90  | -119.00   |
| N4060W11520 | 40.60 | -115.20 | N4060W11970 | 40.60  | -119.70   |
| N4000W11600 | 40.00 | -116.00 | N3980W11850 | 39.80  | -118.50   |
| N4040W11650 | 40.40 | -116.50 | N4045W11730 | 40.45  | -117.30   |
| N4070W11700 | 40.70 | -117.00 | N4250W11255 | 42.50  | -112.55   |
| N3990W11670 | 39.90 | -116.70 | N3845W11750 | 38.45  | -117.50   |
| N4010W11715 | 40.10 | -117.15 | N4464W11184 | 44.64  | -11184.00 |
| N4025W11800 | 40.25 | -118.00 | N3714W11720 | 37.14  | -117.20   |
| N4020W11890 | 40.20 | -118.90 | N0860W07470 | 8.60   | -74.70    |
| N4035W11910 | 40.35 | -119.10 | N0680W07030 | 6.80   | -70.30    |
| N4020W11930 | 40.20 | -119.30 | N0700W07400 | 7.00   | -74.00    |
| N4000W11955 | 40.00 | -119.55 | S0400W07500 | -4.00  | -75.00    |
| N4070W11830 | 40.70 | -118.30 | S0630W08050 | -6.30  | -80.50    |
| N4160W12010 | 41.60 | -120.10 | S1100W07610 | -11.00 | -76.10    |
| N4220W11330 | 42.20 | -113.30 | S1500W06500 | -15.00 | -65.00    |
| N4250W11285 | 42.50 | -112.85 | S1850W05650 | -18.50 | -56.50    |
| N4450W11380 | 44.50 | -113.80 | S2300W06040 | -23.00 | -60.40    |
| N4390W11350 | 43.90 | -113.50 | S2130W06700 | -21.30 | -67.00    |
| N4270W11800 | 42.70 | -118.00 | S2045W06950 | -20.45 | -69.50    |
| N4252W11848 | 42.52 | -118.48 | S2290W06860 | -22.90 | -68.60    |
| N4550W11350 | 45.50 | -113.50 | S2350W06590 | -23.50 | -65.90    |
| N4485W11277 | 44.85 | -112.77 | S2350W06670 | -23.50 | -66.70    |
| N4550W11240 | 45.50 | -112.40 | S2350W06820 | -23.50 | -68.20    |
| N4522W11170 | 45.22 | -111.70 | S2385W06880 | -23.85 | -68.80    |
| N4635W11275 | 46.35 | -112.75 | S2460W06900 | -24.60 | -69.00    |
| N4635W11410 | 46.35 | -114.10 | S2500W06680 | -25.00 | -66.80    |
| N3767W12180 | 37.67 | -121.80 | S2530W06620 | -25.30 | -66.20    |
| N6370W15175 | 63.70 | -151.75 | S2700W06640 | -27.00 | -66.40    |
| N6442W14715 | 64.42 | -147.15 | S2750W06770 | -27.50 | -67.70    |
| N6660W14560 | 66.60 | -145.60 | S2870W06842 | -28.70 | -68.42    |
| N6975W14950 | 69.75 | -149.50 | S2915W06830 | -29.15 | -68.30    |
| N6300W14180 | 63.00 | -141.80 | S2900W06740 | -29.00 | -67.40    |
| N3750W12100 | 37.50 | -121.00 | S2855W06660 | -28.55 | -66.60    |
| N2435W10135 | 24.35 | -101.35 | S3075W06800 | -30.75 | -68.00    |
| N2450W10050 | 24.50 | -100.50 | S3030W06920 | -30.30 | -69.20    |
| N2495W10413 | 24.95 | -104.13 | S3190W06950 | -31.90 | -69.50    |
| N2540W10419 | 25.40 | -104.19 | S3550W06910 | -35.50 | -69.10    |
| N4190W11872 | 41.90 | -118.72 | S3330W06720 | -33.30 | -67.20    |

|             |        |        |             |        |        |
|-------------|--------|--------|-------------|--------|--------|
| S3970W06880 | -39.70 | -68.80 | N3100E00200 | 31.00  | 2.00   |
| S1875W06710 | -18.75 | -67.10 | N3110W00500 | 31.10  | -5.00  |
| S1910W06820 | -19.10 | -68.20 | N3090W00550 | 30.90  | -5.50  |
| S3700W07250 | -37.00 | -72.50 | N3020W00580 | 30.20  | -5.80  |
| S2250W06600 | -22.50 | -66.00 | N3000W00555 | 30.00  | -5.55  |
| S2010W06750 | -20.10 | -67.50 | N3100W00690 | 31.00  | -6.90  |
| S2490W06697 | -24.90 | -66.97 | N3000W00730 | 30.00  | -7.30  |
| S2500W06706 | -25.00 | -67.06 | N2740W00710 | 27.40  | -7.10  |
| S2505W06713 | -25.05 | -67.13 | N2910E01600 | 29.10  | 16.00  |
| S2450W06700 | -24.50 | -67.00 | N1400E04040 | 14.00  | 40.40  |
| S3360W06910 | -33.60 | -69.10 | N1350E01390 | 13.50  | 13.90  |
| S3230W06937 | -32.30 | -69.37 | N0850E04850 | 8.50   | 48.50  |
| S3120W06862 | -31.20 | -68.62 | N1000E02750 | 10.00  | 27.50  |
| S3080W06890 | -30.80 | -68.90 | N0900E01900 | 9.00   | 19.00  |
| S2650W06750 | -26.50 | -67.50 | N0770E03870 | 7.70   | 38.70  |
| S1500W06930 | -15.00 | -69.30 | N0500E03550 | 5.00   | 35.50  |
| N4540E00960 | 45.40  | 9.60   | N0450E03530 | 4.50   | 35.30  |
| N4583E01270 | 45.83  | 12.70  | N0450E03500 | 4.50   | 35.00  |
| N4430E02520 | 44.30  | 25.20  | N0480E03450 | 4.80   | 34.50  |
| N4210E02500 | 42.10  | 25.00  | N0360E03480 | 3.60   | 34.80  |
| N4265E02350 | 42.65  | 23.50  | N0350E03515 | 3.50   | 35.15  |
| N3950E02180 | 39.50  | 21.80  | N0243E03580 | 2.43   | 35.80  |
| S3390E14290 | -33.90 | 142.90 | S0700E03025 | -7.00  | 30.25  |
| S3005E14770 | -30.05 | 147.70 | S0700E03580 | -7.00  | 35.80  |
| S3060E13770 | -30.60 | 137.70 | S0850E03850 | -8.50  | 38.50  |
| S3060E13990 | -30.60 | 139.90 | S0850E03620 | -8.50  | 36.20  |
| S3000E14635 | -30.00 | 146.35 | S0850E03400 | -8.50  | 34.00  |
| S2900E14240 | -29.00 | 142.40 | S0840E02650 | -8.40  | 26.50  |
| S2825E13720 | -28.25 | 137.20 | S1000E02730 | -10.00 | 27.30  |
| S2670E13910 | -26.70 | 139.10 | S0980E02860 | -9.80  | 28.60  |
| S2650E14180 | -26.50 | 141.80 | S1150E03280 | -11.50 | 32.80  |
| S2638E14340 | -26.38 | 143.40 | S1500E02300 | -15.00 | 23.00  |
| S2500E14005 | -25.00 | 140.05 | S1500E03530 | -15.00 | 35.30  |
| S2450E13550 | -24.50 | 135.50 | S1640E03500 | -16.40 | 35.00  |
| S2250E11960 | -22.50 | 119.60 | S1950E02400 | -19.50 | 24.00  |
| S2290E13250 | -22.90 | 132.50 | S2050E02600 | -20.50 | 26.00  |
| S2160E14590 | -21.60 | 145.90 | S2270E03315 | -22.70 | 33.15  |
| S2110E14610 | -21.10 | 146.10 | S0100E03985 | -1.00  | 39.85  |
| S1850E14100 | -18.50 | 141.00 | N2500E01350 | 25.00  | 13.50  |
| S0580E14030 | -5.80  | 140.30 | S1890E03450 | -18.90 | 34.50  |
| N3546E00470 | 35.46  | 4.70   | N0540E03280 | 5.40   | 32.80  |
| N3586E00655 | 35.86  | 6.55   | N0920E03360 | 9.20   | 33.60  |
| N3575E00683 | 35.75  | 6.83   | N1625E03610 | 16.25  | 36.10  |
| N3570E00710 | 35.70  | 7.10   | N3090W00570 | 30.90  | -5.70  |
| N3552E00760 | 35.52  | 7.60   | N3020W00690 | 30.20  | -6.90  |
| N3425E00625 | 34.25  | 6.25   | S0360E03510 | -3.60  | 35.10  |
| N3430E00060 | 34.30  | 0.60   | N2990W00690 | 29.90  | -6.90  |
| N3320W00380 | 33.20  | -3.80  | N2970W00620 | 29.70  | -6.20  |
| N3160W00800 | 31.60  | -8.00  | N2720W01140 | 27.20  | -11.40 |
| N3240W00650 | 32.40  | -6.50  | N3160W00500 | 31.60  | -5.00  |

|             |        |       |             |       |        |
|-------------|--------|-------|-------------|-------|--------|
| N3180W00490 | 31.80  | -4.90 | N3915E02740 | 39.15 | 27.40  |
| N1050E04390 | 10.50  | 43.90 | N3840E02850 | 38.40 | 28.50  |
| N1050E04980 | 10.50  | 49.80 | N3815E02800 | 38.15 | 28.00  |
| S2200E04370 | -22.00 | 43.70 | N3785E02825 | 37.85 | 28.25  |
| N2200E04555 | 22.00  | 45.55 | N3825E02980 | 38.25 | 29.80  |
| N2160E05600 | 21.60  | 56.00 | N3915E02890 | 39.15 | 28.90  |
| N3070E03530 | 30.70  | 35.30 | N3945E03000 | 39.45 | 30.00  |
| N3170E04615 | 31.70  | 46.15 | N3770E03015 | 37.70 | 30.15  |
| N3120E04960 | 31.20  | 49.60 | N2075E04700 | 20.75 | 47.00  |
| N3115E05265 | 31.15  | 52.65 | N1650E04240 | 16.50 | 42.40  |
| N3060E05265 | 30.60  | 52.65 | N2500E03897 | 25.00 | 38.97  |
| N3050E05250 | 30.50  | 52.50 | N2560E03850 | 25.60 | 38.50  |
| N3050E05230 | 30.50  | 52.30 | N3800E09300 | 38.00 | 93.00  |
| N3000E05250 | 30.00  | 52.50 | N4000E08500 | 40.00 | 85.00  |
| N3000E05300 | 30.00  | 53.00 | N4500E08700 | 45.00 | 87.00  |
| N3008E05310 | 30.08  | 53.10 | N3575E09550 | 35.75 | 95.50  |
| N3197E05130 | 31.97  | 51.30 | N3558E09713 | 35.58 | 97.13  |
| N3190E05110 | 31.90  | 51.10 | N3530E09850 | 35.30 | 98.50  |
| N3210E05115 | 32.10  | 51.15 | N4250E07750 | 42.50 | 77.50  |
| N3210E05165 | 32.10  | 51.65 | N4140E07530 | 41.40 | 75.30  |
| N3260E05140 | 32.60  | 51.40 | N4110E07575 | 41.10 | 75.75  |
| N3250E04750 | 32.50  | 47.50 | N4080E07600 | 40.80 | 76.00  |
| N4055E04510 | 40.55  | 45.10 | N4180E07515 | 41.80 | 75.15  |
| N3440E04520 | 34.40  | 45.20 | N4200E07450 | 42.00 | 74.50  |
| N3426E04625 | 34.26  | 46.25 | N4220E07400 | 42.20 | 74.00  |
| N3415E04670 | 34.15  | 46.70 | N4220E07550 | 42.20 | 75.50  |
| N3470E04650 | 34.70  | 46.50 | N4350E07350 | 43.50 | 73.50  |
| N3430E04815 | 34.30  | 48.15 | N4550E07600 | 45.50 | 76.00  |
| N3375E04885 | 33.75  | 48.85 | N4620E09510 | 46.20 | 95.10  |
| N3435E04860 | 34.35  | 48.60 | N3850E10620 | 38.50 | 106.20 |
| N3460E04910 | 34.60  | 49.10 | N4280E09030 | 42.80 | 90.30  |
| N3420E04980 | 34.20  | 49.80 | N1300E10400 | 13.00 | 104.00 |
| N3370E05015 | 33.70  | 50.15 | N1800E09650 | 18.00 | 96.50  |
| N3360E05075 | 33.60  | 50.75 | N1750E09550 | 17.50 | 95.50  |
| N3400E05060 | 34.00  | 50.60 | N2610E06450 | 26.10 | 64.50  |
| N3455E05080 | 34.55  | 50.80 | N2620E06400 | 26.20 | 64.00  |
| N3490E05060 | 34.90  | 50.60 | N2670E06350 | 26.70 | 63.50  |
| N3535E05050 | 35.35  | 50.50 | N2705E06490 | 27.05 | 64.90  |
| N3560N05050 | 35.60  | 50.50 | N2705E06450 | 27.05 | 64.50  |
| N3600E05000 | 36.00  | 50.00 | N2700E06550 | 27.00 | 65.50  |
| N3510E04410 | 35.10  | 44.10 | N2700E06580 | 27.00 | 65.80  |
| N3790E04750 | 37.90  | 47.50 | N2650E09670 | 26.50 | 96.70  |
| N3750E04550 | 37.50  | 45.50 | N2755E08400 | 27.55 | 84.00  |
| N3800E04000 | 38.00  | 40.00 | N2784E08255 | 27.84 | 82.55  |
| N3830N03190 | 38.30  | 31.90 | N2805E08230 | 28.05 | 82.30  |
| N3880E03330 | 38.80  | 33.30 | N2850E06300 | 28.50 | 63.00  |
| N3930E03450 | 39.30  | 34.50 | N2870E06630 | 28.70 | 66.30  |
| N4000E04430 | 40.00  | 44.30 | N2815E08810 | 28.15 | 88.10  |
| N4020E04780 | 40.20  | 47.80 | N2800E08930 | 28.00 | 89.30  |
| N4100E04750 | 41.00  | 47.50 | N2850E08990 | 28.50 | 89.90  |

|             |       |       |             |       |        |
|-------------|-------|-------|-------------|-------|--------|
| N2730E09750 | 27.30 | 97.50 | N3330E08480 | 33.30 | 84.80  |
| N2935E08900 | 29.35 | 89.00 | N3310E08520 | 33.10 | 85.20  |
| N3025E08450 | 30.25 | 84.50 | N3280E08800 | 32.80 | 88.00  |
| N3015E08370 | 30.15 | 83.70 | N3315E08800 | 33.15 | 88.00  |
| N3000E08350 | 30.00 | 83.50 | N3300E08870 | 33.00 | 88.70  |
| N2970E06745 | 29.70 | 67.45 | N3230E08870 | 32.30 | 88.70  |
| N3000E06500 | 30.00 | 65.00 | N3222E08900 | 32.22 | 89.00  |
| N3050E06150 | 30.50 | 61.50 | N3150E10600 | 31.50 | 106.00 |
| N3100E08330 | 31.00 | 83.30 | N3420E09350 | 34.20 | 93.50  |
| N3050E08860 | 30.50 | 88.60 | N3430E06220 | 34.30 | 62.20  |
| N3200E08820 | 32.00 | 88.20 | N3575E08150 | 35.75 | 81.50  |
| N3240E08810 | 32.40 | 88.10 | N3610E08250 | 36.10 | 82.50  |
| N3240E08740 | 32.40 | 87.40 | N3310E10700 | 33.10 | 107.00 |
| N3230E08660 | 32.30 | 86.60 | N3660E09200 | 36.60 | 92.00  |
| N3215E08680 | 32.15 | 86.80 | N3750E08950 | 37.50 | 89.50  |
| N3217E08620 | 32.17 | 86.20 | N3760E07530 | 37.60 | 75.35  |
| N3223E08585 | 32.23 | 85.85 | N3710E06680 | 37.10 | 66.80  |
| N3215E08500 | 32.15 | 85.00 | N3910E07440 | 39.10 | 74.40  |
| N3230E08385 | 32.30 | 83.85 | N3805E08925 | 38.05 | 89.25  |
| N3185E08310 | 31.85 | 83.10 | N3865E09010 | 38.65 | 90.10  |
| N3250E08320 | 32.50 | 83.20 | N3820E09065 | 38.20 | 90.65  |
| N3240E08290 | 32.40 | 82.90 | N3720E09635 | 37.20 | 96.35  |
| N3210E08300 | 32.10 | 83.00 | N3720E09700 | 37.20 | 97.00  |
| N3230E08220 | 32.30 | 82.20 | N3670E09900 | 36.70 | 99.00  |
| N3260E08225 | 32.60 | 82.25 | N3660E09850 | 36.60 | 98.50  |
| N3282E08220 | 32.82 | 82.20 | N3820E10270 | 38.20 | 102.70 |
| N3250E08130 | 32.50 | 81.30 | N3900E10060 | 39.00 | 100.60 |
| N3260E08155 | 32.60 | 81.55 | N3875E09900 | 38.75 | 99.00  |
| N3215E08000 | 32.15 | 80.00 | N3840E09840 | 38.40 | 98.40  |
| N3250E08000 | 32.50 | 80.00 | N3890E09820 | 38.90 | 98.20  |
| N3200E06700 | 32.00 | 67.00 | N3857E09592 | 38.57 | 95.92  |
| N3170E06570 | 31.70 | 65.70 | N3900E09600 | 39.00 | 96.00  |
| N3250E06100 | 32.50 | 61.00 | N3975E09600 | 39.75 | 96.00  |
| N3280E06160 | 32.80 | 61.60 | N3930E09640 | 39.30 | 96.40  |
| N3330E06200 | 33.30 | 62.00 | N3900E09450 | 39.00 | 94.50  |
| N3260E06815 | 32.60 | 68.15 | N4000E09400 | 40.00 | 94.00  |
| N3315E06830 | 33.15 | 68.30 | N4020E07850 | 40.20 | 78.50  |
| N3395E06900 | 33.95 | 69.00 | N4043E07830 | 40.43 | 78.30  |
| N3415E07200 | 34.15 | 72.00 | N3960E07260 | 39.60 | 72.60  |
| N3400E07480 | 34.00 | 74.80 | N4050E07160 | 41.60 | 71.60  |
| N3405E07765 | 34.05 | 77.65 | N4150E07950 | 41.50 | 79.50  |
| N3335E08060 | 33.35 | 80.60 | N4180E08200 | 41.70 | 82.00  |
| N3320E08140 | 33.20 | 81.40 | N4200E08700 | 42.00 | 87.00  |
| N3380E08200 | 33.80 | 82.00 | N4120E08860 | 41.20 | 88.60  |
| N3305E08250 | 33.05 | 82.50 | N4186E08826 | 41.86 | 88.26  |
| N3330E08270 | 33.30 | 82.70 | N4204E08807 | 42.04 | 88.07  |
| N3335E08305 | 33.35 | 83.05 | N4167E08848 | 41.67 | 88.48  |
| N3300E08400 | 33.00 | 84.00 | N4184E09820 | 41.84 | 89.20  |
| N3340E08420 | 33.40 | 84.20 | N4280E08400 | 42.80 | 84.00  |
| N3365E08440 | 33.65 | 84.40 | N4380E08050 | 43.80 | 80.50  |

|             |       |        |             |       |        |
|-------------|-------|--------|-------------|-------|--------|
| N4350E08800 | 43.50 | 88.00  | N5430E13350 | 54.30 | 133.50 |
| N4366E09284 | 43.66 | 92.84  | N6300E13500 | 63.00 | 135.00 |
| N4340E09420 | 43.40 | 94.20  | N5960E14700 | 59.60 | 147.00 |
| N4385E09473 | 43.85 | 94.73  | N6030E14700 | 60.30 | 147.00 |
| N4270E09800 | 42.70 | 98.00  | N2750E05840 | 27.50 | 58.40  |
| N4350E09800 | 43.50 | 98.00  | N2790E05350 | 27.90 | 53.50  |
| N4325E09850 | 43.25 | 98.50  | N2940E05400 | 29.40 | 54.00  |
| N4335E09880 | 43.35 | 98.80  | N2900E05500 | 29.00 | 55.00  |
| N4242E09932 | 42.50 | 99.50  | N2930E05590 | 29.30 | 55.90  |
| N4100E10750 | 41.00 | 107.50 | N2900E05900 | 29.00 | 59.00  |
| N4050E11100 | 40.50 | 111.00 | N3070E05550 | 30.70 | 55.50  |
| N4250E10600 | 42.50 | 106.00 | N3100E05350 | 31.00 | 53.50  |
| N4250E10520 | 42.50 | 105.20 | N3250E05250 | 32.50 | 52.50  |
| N4355E10320 | 43.55 | 103.20 | N3200E05400 | 32.00 | 54.00  |
| N4330E10270 | 43.30 | 102.70 | N3200E05500 | 32.00 | 55.00  |
| N4285E10330 | 42.85 | 103.30 | N3100E05550 | 31.00 | 55.50  |
| N4385E10050 | 43.85 | 100.50 | N3100E05600 | 31.00 | 56.00  |
| N4420E10175 | 44.20 | 101.75 | N3080E05850 | 30.80 | 58.50  |
| N4430E09800 | 44.30 | 98.00  | N3275E05750 | 32.75 | 57.50  |
| N4450E09850 | 44.50 | 98.50  | N3320E05700 | 33.20 | 57.00  |
| N4450E09670 | 44.50 | 96.70  | N3275E05375 | 32.75 | 53.75  |
| N4550E09250 | 45.50 | 92.50  | N3315E05460 | 33.15 | 54.60  |
| N4550E09100 | 45.50 | 91.00  | N3350E05550 | 33.50 | 55.50  |
| N4620E08500 | 46.20 | 85.00  | N3350E05250 | 33.50 | 52.50  |
| N4670E09300 | 46.70 | 93.00  | N3450E05200 | 34.50 | 52.00  |
| N4725E09275 | 47.25 | 92.75  | N3500E05200 | 35.00 | 52.00  |
| N4680E09450 | 46.80 | 94.50  | N3450E05750 | 34.50 | 57.50  |
| N4575E09710 | 45.75 | 97.10  | N3500E05750 | 35.00 | 57.50  |
| N4630E09750 | 46.30 | 97.50  | N3600E05480 | 36.00 | 54.80  |
| N4550E09950 | 45.50 | 99.50  | N3670E05650 | 36.70 | 56.50  |
| N4530E09900 | 45.30 | 99.00  | N3800E06000 | 38.00 | 60.00  |
| N4500E09900 | 45.00 | 99.00  | N2700E08000 | 27.00 | 80.00  |
| N4930E09300 | 49.30 | 93.00  | N2700E09400 | 27.00 | 94.00  |
| N4765E09350 | 47.65 | 93.50  | N2850E07040 | 28.50 | 70.40  |
| N4800E09200 | 48.00 | 92.00  | N3710E05700 | 37.10 | 57.00  |
| N4730E08680 | 47.30 | 86.80  | N3730E05680 | 37.30 | 56.80  |
| N4680E08600 | 46.80 | 86.00  | N4500E06000 | 45.00 | 60.00  |
| N4650E08130 | 46.50 | 81.30  | N3715E08800 | 37.15 | 88.00  |
| N4850E07800 | 48.50 | 78.00  | N3790E09510 | 37.90 | 95.10  |
| N4885E07950 | 48.85 | 79.50  | N3430E07070 | 34.30 | 70.70  |
| N4800E08400 | 48.00 | 84.00  | N3380E07200 | 33.80 | 72.00  |
| N4950E09050 | 49.50 | 90.50  | N4650E09400 | 46.50 | 94.00  |
| N5050E09250 | 50.50 | 92.50  | N4343E09484 | 43.43 | 94.84  |
| N5020E09100 | 50.20 | 91.00  | N4000E10200 | 40.00 | 102.00 |
| N5000E08850 | 50.00 | 88.50  | N4300E08500 | 43.00 | 85.00  |
| N5160E09250 | 51.60 | 92.50  | N4230E10125 | 42.30 | 101.25 |
| N5125E10830 | 51.25 | 108.30 | N3940E10350 | 39.40 | 103.50 |
| N5200E10600 | 52.00 | 106.00 | N3500E05500 | 35.00 | 55.00  |
| N4950E13650 | 49.50 | 136.50 | N5000E13600 | 50.00 | 136.00 |
| N5070E13400 | 50.70 | 134.00 | N4840E13420 | 48.40 | 134.20 |



|             |       |        |             |       |        |
|-------------|-------|--------|-------------|-------|--------|
| N1550E10050 | 15.50 | 100.50 | N3240E08920 | 32.40 | 89.20  |
| N4070E06850 | 40.70 | 68.50  | N3232E08940 | 32.32 | 89.40  |
| N3030E07790 | 30.30 | 77.90  | N3220E08940 | 32.20 | 89.40  |
| N3550E09650 | 35.50 | 96.50  | N3250E09010 | 32.50 | 90.10  |
| N6250E15300 | 62.50 | 153.00 | N3400E06120 | 34.00 | 61.20  |
| N4725E09600 | 47.25 | 96.00  | N3275E06020 | 32.75 | 60.20  |
| N4930E13480 | 49.30 | 134.80 | N3250E05925 | 32.50 | 59.25  |
| N6510E17150 | 65.10 | 171.50 | N3220E05890 | 32.20 | 58.90  |
| N6425E17620 | 64.25 | 176.20 | N3210E05855 | 32.10 | 58.55  |
| N3325E08720 | 33.25 | 87.20  | N4000E07790 | 40.00 | 77.90  |
| N3340E08690 | 33.40 | 86.90  | N4340E10475 | 43.40 | 104.75 |
| N3315E08733 | 33.15 | 87.33  | N4370E10430 | 43.70 | 104.30 |
| N3290E08670 | 32.90 | 86.70  | N4510E09555 | 45.10 | 95.55  |
| N3263E08655 | 32.63 | 86.55  | N4545E09555 | 45.45 | 95.55  |
| N3260E08625 | 32.60 | 86.25  | N4521E09560 | 45.21 | 95.60  |
| N3275E08695 | 32.75 | 86.95  | N4650E08310 | 46.50 | 83.10  |
| N3290E08720 | 32.90 | 87.20  | N4285E13040 | 42.85 | 130.40 |
| N3287E08690 | 32.87 | 86.90  | N3580E11480 | 35.80 | 114.80 |
| N3355E08750 | 33.55 | 87.50  |             |       |        |
